# Supplementary material
Source: publisher figshare collection journal article supplement (https://springernature.figshare.com/ndownloader/files/20270703)
Supplement: Supplementary file 1 [file 20270703]

%% GAITREC Dataset | Data import script
% Copyright (C)  2019  Djordje Slijepcevic
% 
% This program is free software: you can redistribute it and/or modify
% it under the terms of the GNU General Public License as published by
% the Free Software Foundation, either version 3 of the License, or
% (at your option) any later version.
% 
% This program is distributed in the hope that it will be useful,
% but WITHOUT ANY WARRANTY; without even the implied warranty of
% MERCHANTABILITY or FITNESS FOR A PARTICULAR PURPOSE. See the
% GNU General Public License for more details.
% 
% You should have received a copy of the GNU General Public License
% along with this program. If not, see <http://www.gnu.org/licenses/>.

%% Reading in of RAW DATA
% Left lower extremity
GRF_F_V_RAW_left = readtable('GRF_F_V_RAW_left.csv');
GRF_F_AP_RAW_left = readtable('GRF_F_AP_RAW_left.csv');
GRF_F_ML_RAW_left = readtable('GRF_F_ML_RAW_left.csv');
GRF_COP_ML_RAW_left = readtable('GRF_COP_ML_RAW_left.csv');
GRF_COP_AP_RAW_left = readtable('GRF_COP_AP_RAW_left.csv');

% Right lower extremity
GRF_F_V_RAW_right = readtable('GRF_F_V_RAW_right.csv');
GRF_F_AP_RAW_right = readtable('GRF_F_AP_RAW_right.csv');
GRF_F_ML_RAW_right = readtable('GRF_F_ML_RAW_right.csv');
GRF_COP_ML_RAW_right = readtable('GRF_COP_ML_RAW_right.csv');
GRF_COP_AP_RAW_right = readtable('GRF_COP_AP_RAW_right.csv');

%% Reading in of PROCESSED DATA
% Left lower extremity
GRF_F_V_PRO_left = readtable('GRF_F_V_PRO_left.csv');
GRF_F_AP_PRO_left = readtable('GRF_F_AP_PRO_left.csv');
GRF_F_ML_PRO_left = readtable('GRF_F_ML_PRO_left.csv');
GRF_COP_ML_PRO_left = readtable('GRF_COP_ML_PRO_left.csv');
GRF_COP_AP_PRO_left = readtable('GRF_COP_AP_PRO_left.csv');

% Right lower extremity
GRF_F_V_PRO_right = readtable('GRF_F_V_PRO_right.csv');
GRF_F_AP_PRO_right = readtable('GRF_F_AP_PRO_right.csv');
GRF_F_ML_PRO_right = readtable('GRF_F_ML_PRO_right.csv');
GRF_COP_ML_PRO_right = readtable('GRF_COP_ML_PRO_right.csv');
GRF_COP_AP_PRO_right = readtable('GRF_COP_AP_PRO_right.csv');

%% Reading in of the METADATA file including the annotations
GRF_Annotation = readtable('GRF_metadata.csv');
